# Supplementary material for: SNP and Haplotype Variability in the BnP5CR2 Gene and Association with Resistance and Susceptible Cultivars for Sclerotinia sclerotiorum in Brassica napus
Source: MDPI journal article supplement (doi:10.3390/agronomy12122956), 2022-11-25
Supplement: s1 [file s1]

>ZS11

-----  
-----  
-----CATTTA  
GAACCTAAATCGTT--  
TTCAGTCAATAATTTATTTTGCATGGAGACGCTTCCAATTTCCGCGGAGAGCTTCAAGGTAGG  
GTTTCATCGGAGCTGGAAGATGGCGGAGAGTATAGCTCGAGGCGTCGTTGCCTCCGGGATGCTTCCTCCG  
AATCGCATCT  
CCACCGCCGTTCACTCGAATCTGAATCGCCGTCAAGTCTTCGAGTCCTTTGGCGTCAATGTCTTCTCCAG  
TAGCGAAGAA  
GTAAGTAAATCTTCTTCTCTTTTACATTTCTCTATTTCATTGTCATTGGAGTAAAACCATGAACTGAGGG  
ATTTTGAAAT  
CTTTTGGCAGGTTGTTAGAGAAAGCGATGTTGTGATCTTCTCTGTGAAACCTCAAGTTGGTATGGTTTCT  
ACATCTCAGT  
TTTATTCTCCATTGAATCATAATCGAATAGAAAATAAAACAATTTGAGATCTATAATCCGTTGATCTGCG  
GAATTTACTT  
AAAGCTGTACCTTGCTTATGCAGTTAAGAAGGCCATCACGGAAGTAAGGTCAACGCTCTCTAAGGATAA  
GGTCTTGTT  
TCCGTTGCTGCGGGGATCAAGTTGAAAGATCTTCAGGTTGTCATCTTTGTTGATAAAGGAGTATACTTG  
TCAGAGAGAT  
CTGTTAGTACAAGTTCATCAGTCTGAATCATAAGCTCTATGGTTCTATCACTACCCATCAGTGTTCGA  
TCTAACATGC  
TCCC-TTTGAAACAAAATCTGAAAGATTT-  
AATTTTTTGGTCTTTTGCTAGGAATGGTCTGGTCAAGATCGATTTCATAAG  
GGTGATGCCTAATACACCAGCTGCAGTTGGTGAGGCAGCTTCAGGTAGTTTCTCCAAGAGTCCCTGTTTG  
TGGTTTATTA  
CTATCAAATGCCTACTGATGATGAAGGTTATGTCTTGTTGTGAAACAGTAATGAGCCTTGGAACAGCGGCA  
ACGGAAGAAG  
ACGGAGCACTGTGACTAGGTTGTTTGGCTCTGTGGGAAGATGTTCAAAGCTGATGAGAAAATGTTTGA  
TGCTGTCACT  
GGTCTCAGGTACGTCACGGTTTCTGAATGTCTTAAGTTGTTCAAGTTACCATCTGAAA-  
TTTTCGATCTTGTTACAGTGG  
AAGTGGACCAGCGTACATATTCTTAGCCATTGAAGCTTTAGCTGATGGAGGAGTAGCTGCTGGTTTACCC  
CGAGAACTTG  
CTTTGGGTTTAGCTTCACAGACGGTCAGTCAGCTGACCCATAGGTCCCTCTACAGCTTCTTTAATCTTTT  
TTTTTT-CCA  
AACC-----AAACCTAGAAAGAGAAGCCTGAGCTGTGTGTGT-----  
CTATGGCAGGTTCTTGAGCTGCAA  
CAATGGTGAGCAAAACCGGAAGCATCCGGGTGTGTTGAAAGATGATGTTACTTCACCAGCGGGGACTAC  
AATAGCCGGA  
GTTTCATGAAGTGGAGAAAGGTTCTTTCCGTGCAACACTTATGAATGCTGTTGTTGCTGCAGCTAATCGAA  
GCCGTGAACT  
CTCGCAGAGCTAAATTATATAAGAGAGTTAGTTGCATCTATTATTTACCTCACAGATTACACAAAATAA

GAGGTTTTGA  
TATT-GCTTTGGTAGATGTGAAAACTATTTATCTGGTCC-TAGTTTGG-  
TTCAGATCTCAGCTACTTTGTTACTATTCT  
TATAT-CTAATAAAAACTTCATATGTCTCA  
>ChuanYou36  
-----  
-----  
-----  
-----  
CAGTCAATAATTTATTTTGGGATGGAGACGCTTCCAATTTCCGCGGAGAGCTTCAAGGTAGG  
GTTTCATCGGAGCTGGAAAGATGGCGGAGAGTATAGCTCGAGGCGTCGTTGCCTCCGGGATGCTTCCTCCG  
AATCGCATCT  
CCACCGCCGTTCACTCGAATCTGAATCGCCGTCAAGTCTTCGAGTCCTTTGGCGTCAATGTCTTCTCCAG  
TAGCGAAGAA  
GTAAGTAAATCTTCTTCTTTTACATTTCTCTATTCAATTTGTCATTGGAGTAAAACCATGAACTGAGGG  
ATTTTGAAAT  
CTTTTGGCAGGTTGTTAGAGAAAGCGATGTTGTGATCTTCTCTGTGAAACCTCAAGTTGGTATGGTTTCT  
ACATCTCAGT  
TTTATTCTCCATTGAATCATAATCGAATAGAAAATAAAACAATTTGAGATCTATAATCCGTTGATCTGCG  
GAATTTACTT  
AAAGCTGTACCTTGTCTTATGCAGTTAAGAAGGCCATCACGGAAGTAAGGTCAACGCTCTCTAAGGATAA  
GGTCTTGTT  
TCCGTTGCTGCGGGGATCAAGTTGAAAGATCTTCAGGTTGTCATCTTTGTTGATAAAGGAGTATACTTTG  
TCAGAGAGAT  
CTGTTAGTACAAGTTCATCAGTCTGAATCATAAGCTCTATGGTTCTATCACTACCCATCAGTGTTCGCA  
TCTAACATGC  
TCCC-TTTGAAACAAAATCTGAAAGATTT-  
AATTTTTTGGTCTTTTGCTAGGAATGGTCTGGTCAAGATCGATTCATAAG  
GGTGATGCCTAATACACCAGCTGCAGTTGGTGAGGCAGCTTCAGGTAGTTTCTCTCATAATCCATGTTTG  
TGATTTATTA  
CTATCAAATGCCTACTGATGATGAAGGTTATGTCTTGTGTGAAACAGTAATGAGCCTTGGAACAGCGGCA  
ACGGAAGAAG  
ACGGAGCACTTGTGCTAAGTTGTTTGGCTCTGTGGGAAGATGTTCAAAGCTGATGAGAAAATGTTTGA  
TGCTGTCACT  
GGTCTCAGGTA CTTCACGGTTTCTGAATGTCTTAAGTTGTTCAAGTTACCATCTGAAA-  
TTTTCGATCTTGTTACAGTGG  
AAGTGGACCAGCGTACATATTCTTAGCCATTGAAGCTTTAGCTGATGGAGGAGTAGCTGCTGGTTTACCC  
CGAGAACTTG  
CTTTGGGTTTAGCTTCACAGACGGTCAGTGAACTGACCCATTGGTCCC-  
CTACAGCTTCTTAATCCTTTTTTCTTTTCT  
GTTTGTCTTAATGTTTTGAAAACTAGAAAAGAGAAGCCTGAGCTGTGTGTGTGTGTCTACGGCAGGTGCTT  
GGAGCTGCAA  
CAATGGTGAGCAAAAACGGGAAGCATCCGGGTGTGTTGAAAGATGATGTTACTTCACCAGGCGGGACTAC

AATAGCCGGA  
GTTTCATGAACTGGAGAAAGGTTCTTTCCGTGCAACACTTATGAATGCTGTTGTTGCTGCAGCTGATCGAA  
GCCGTGAACT  
CTCAGAGAGCTAAATTATATAAGAGAGTTAGTTGCATCTATTATTTACCTCACAGATTACCAAAAATAA  
GAGGTTTTGA  
TATTTGCTTTGGTAGATGTGAAAACTATTTATCTGGTCC-TAGTCTGG-  
TTCAGATCTCAGCTACTTTGTTAA-----  
-----

>NQ2107

-----  
-----  
-----  
-----  
-----

CAGTCAATAATTTATTTTGGCATGGAGACGCTTCCAATTTCCGCGGAGAGCTTCAAGGTAGG  
GTTTCATCGGAGCTGGAAAGATGGCGGAGAGTATAGCTCGAGGCGTCGTTGCCTCCGGGATGCTTCCTCCG  
AATCGCATCT  
CCACCGCCGTTCACTCGAATCTGAATCGCCGTCAAGTCTTCGAGTCCTTTGGCGTCAATGTCTTCTCCAG  
TAGCGAAGAA  
GTAAGTAAATCCTCTTCTCTTTACATTTCTCTATTTCATTTGTCATTGGAGTAAAACCATGAACTGAGGG  
ATTTTGAAAT  
CTTTTGGCAGGTTGTTAGAGAAAGCGATGTTGTGATCTTCTCTGTGAAACCTCAAGTTGGTATGGTTTCT  
ACATCTCAGT  
TTTATTCTCCATTGAATCATAATCGAATAGAAAATAAAACAATTTGAGATCTATAATCCGTTGATCTGCG  
GAATTTACTT  
AAAGCTGTACCTTGTCTTATGCAGTTAAGAAGGCCATCACGGAAGTAAGGTCAACGCTCTCTAAGGATAA  
GGTTCTTGTT  
TCCGTTGCTGCGGGGATCAAGTTGAAAGATCTTCAGGTTGTCATCTTTGTTGATAAAGGAGTATACTTTG  
TCAGAGAGAT  
CTGTTAGTACAAGTTCATCAGTCCTGAATCATAAGCTCTATGGTTCTATCACTACCCATCAGTGTTCGA  
TCTAACATGC  
TCCC-TTTGAAACAAAACCTGAAAGATT-  
AATTTTTTGGTCTTWTGCTAGGAATGGTCTGGTCAAGATCGATWCATAAG  
GGTGATGCCTAATACACCAGCTGCAGTTGRTGAGGCAGCTTCAGGTAGTTTCTCTCATAATCCATGTTTG  
TGATTTATTA  
CTATCAAATGCCTACTGATGATGAAGGTTATGTCTTGTTGTGAAACAGTAATGAGCCTTGGAACAGCGGCA  
ACGGAAGAAG  
ACGGAGCACTTGTGCTAAGTTGTTTGGCTCTGTGGGAAGATGTTCAAAGCTGATGAGAAAATGTTTGA  
TGCTGTCACT  
GGTCTCAGGTACTTCACGGTTTCTGAATGTCTTAAGTTGTTCAAGTTACCATCTGAAA-  
TTTTCGATCTTGTTACAGTGG  
AAGTAGACCAGCGTACATATTCTTAGCCATTGAAGCTTTAGCTGATGGAGGAGTAGCTGCTGGTTTACCC  
CGAGAACTTG  
CTTTGGGTTTAGCTTCACAGACGGTCAGTGAAGTGAACCATTTGGTCCC-

CTACAGCTTCTTTAATCCTTTTTCTTTTCT  
GTTTGTCTTAATGTTTTGAAAACTAGAAAGAGAAGCCTGAGCTGTGTGTGTG---  
TCTATGGCAGGTGCTTGGAGCTGCAA  
CAATGGTGAGCAAAACCGGAAGCATCCGGGTGTGTTGAAAGATGATGTTACTTCACCAGGCGGGACTAC  
AATAGCCGGA  
GTTTCATGAAGTGGAGAAAGGTTCTTTCCGTGCAAACTTATGAATGCTGTTGTTGCTGCAGCTGATCGAA  
GCCGTGAACT  
CTCACAGAGCTAAATTATATAAGAGAGTTAGTTGCATCTATTATTTACCTCACAGATTACCAAAAATAA  
GAGGTTTTGA  
TATTTGCTTTGGTAGATGTGAAAACTATTTATCTGGTCC-TAGTCTGG-  
TTCAGATCTCAGCTACTTTGTAA-----  
-----

>GuoHaoYou5

-----  
-----  
-----  
-----  
-----

TCAGTCAATAATTTATTTTGCATGGAGACGCTTCCAATTTCCGCGGAGAGCTTCAAGGTAGG  
GTTTCATCGGAGCTGGAAAGATGGCGGAGAGTATAGCTCGAGGCGTCGTTGCCTCCGGGATGCTTCCTCCG  
AATCGCATCT  
CCACCGCCGTTCACTCGAATCTGAATCGCCGTCAAGTCTTCGAGTCCTTTGGCGTCAATGTCTTCTCCAG  
TAGCGAAGAA  
GTAAGTAAATCTTCTTCTTTTACATTTCTCTATTCAATTTGTCATTGGAGTAAAACCATGAACTGAGGG  
ATTTTGAAAT  
CTTTTGGCAGGTTGTTAGAGAAAGCGATGTTGTGATCTTCTCTGTGAAACCTCAAGTTGGTATGGTTTCT  
ACATCTCAGT  
TTTATTCTCCATTGAATCATAATCGAATAGAAAATAAAACAATTTGAGATCTATAATCCGTTGATCTGCG  
GAATTTACTT  
AAAGCTGTACCTTGTCTTATGCAGTTAAGAAGGCCATCACGGAAGTAAGGTCAACGCTCTCTAAGGATAA  
GGTTCTTGTT  
TCCGTTGCTGCGGGGATCAAGTTGAAAGATCTTCAGGTTGTCATCTTTGTTGATAAAGGAGTATACTTTG  
TCAGAGAGAT  
CTGTTAGTACAAGTTCATCAGTCCTGAATCATAAGCTCTATGGTTCTATCACTACCCWTCAGTGTTTGCA  
TCTAACATGC  
TCCC-TTTGAAACAAAATCTGAAAGATT-  
AATTTTTTGGTCTTTTGCTAGGAATGGTCTGGTCAAGATCGATTCATAAG  
GGTGATGCCTAATACACCAGCTGCAGTTGGTGAGGCAGCTTCAGGTAGTTTCTCCAAGAGTCCCTGTTTG  
TGGTTTATTA  
CTATCAAATGCCTACTGATGATGAAGGTTATGTCTTGTGTGAAACAGTAATGAGCCTTGGAACAGCGGCA  
ACGGAAGAAG  
ACGGAGCACTTGTGCTAAGTTGTTTGGCTCTGTGGGAAGATGTTCAAAGCTGATGAGAAAAATGTTTGA  
TGCTGTCACT  
GGTCTCAGGTAATTCACGGTTTCTGAATGTCTTAAGTTGTTCAAGTTACCATCTGAAA-

TTTTCGATCTTGTTACAGTGG  
AAGTGGACCAGCGTACATATTCTTAGCCATTGAAGCTTTAGCTGATGGAGGAGTAGCTGCTGGTTTACCC  
CGAGAACTTG  
CTTTGGGTTTAGCTTCACAGACGGTCAGTGAAGTACCCATTGGTCCC-  
CTACAGCTTCTTAATCCTTTTTTCTTTTCT  
GTTTGTCTTAATGTTTTGAAAAGTAGAAAAGAGAAGCCTGAGCTGTGTGTGTGTGTCTATGGCAGGTGCTT  
GGAGCTGCAA  
CAATGGTGAGCAAAAACCGGGAAGCATCCGGGTGTGTTGAAAGATGATGTTACTTCACCAGGCGGGACTAC  
AATAGCCGGA  
GTTTCATGAAGTGGAGAAAGGTTCTTTCCGTGCAACACTTATGAATGCTGTTGTTGCTGCAGCTGATCGAA  
GCCGTGAAGT  
CTCACAGAGCTAAATTATATAAGAGAGTTAGTTGCATCTATTATTTACCTCACAGATTACCAAAAATAA  
GAGGTTTTGA  
TATTTGCTTTGGTAGATGTGAAAAGTATTTATCTGGTCC-TAGTCTGG-  
TTCAGATCTCAGCTACTTTGTTA-----  
-----

>QinYou28

-----  
-----  
-----  
-----  
-----  
CAGTCAATAATTTATTTTGGCATGGAGACGCTTCCAATTTCCGCGGAGAGCTTCAAGGTAGG  
GTTTCATCGGAGCTGGAAAGATGGCGGAGAGTATAGCTCGAGGCGTCGTTGCCTCCGGGATGCTTCCTCCG  
AATCGCATCT  
CCACCGCGTTCACTCGAATCTGAATCGCCGTCAAGTCTTCGAGTCCTTTGGCGTCAATGTCTTCTCCAG  
TAGCGAAGAA  
GTAAGTAAATCTTCTCTCTTTACATTTCTCTATTTCATTTGTCATTGGAGTAAAACCATGAAGTGAAGG  
ATTTTGAAAT  
CTTTTGGCAGGTTGTTAGAGAAAGCGATGTTGTGATCTTCTCTGTGAAACCTCAAGTTGGTATGGTTTCT  
ACATCTCAGT  
TTTATTCTCCATTGAATCATAATCGAATAGAAAATAAAACAATTTGAGATCTATAATCCGTTGATCTGCG  
GAATTTACTT  
AAAGCTGTACCTTGCTTATGCAGTTAAGAAGGCCATCACGGAAGTAAGGTCAACGCTCTCTAAGGATAA  
GGTCTTGTT  
TCCGTTGCTGCGGGGATCAAGTTGAAAGATCTTCAGGTTGTCATCTTTGTTGATAAAGGAGTATACTTTG  
TCAGAGAGAT  
CTGTTAGTACAAGTTCATCAGTCCTGAATCATAAGCTCTATGGTTCTATCACTACCCATCAGTGTTTGCA  
TCTAACATGC  
TCCC-TTTGAAACAAAATCTGAAAGATTT-  
AATTTTTTGGTCTTTTGCTAGGAATGGTCTGGTCAAGATCGATTTCATAAG  
GGTGATGCCTAATACACCAGCTGCAGTTGRTGAGGCAGCTTCAGGTAGTTTCTCCAAGAGTCCCTGTTTG  
TGGTTTATTA  
CTATCAAAATGCCTACTGATGATGAAGGTTATGTCTGTGTGAAACAGTAATGAGCCTTGGAACAGCGGCA

ACGGAAGAAG  
ACGGAGCACTTGTGACTAGGTTGTTTGGCTCTGTGGGAAGATGTTCAAAGCTGATGAGAAAATGTTTGA  
TGCTGTCACT  
GGTCTCAGGTACGTACGGTTTCTGAATGTCTTAAGTTGTTCAAGTTACCATCTGAAAATTTTCGATCTT  
GTTACAGTGG  
AAGTGGACCAGCGTACATATTCTTAGCCATTGAAGCTTTAGCTGATGGAGGAGTAGCTGCTGGTTTACCC  
CGAGAACTTG  
CTTTGGGTTTAGCTTCACAGACGGTCAGTCAGCTGACCCATAGGTCCTCTACAGCTTCTTTAATCTTTT  
TTTTTT-CCA  
AACC-----AAACCTAGAAAGAGAAGCCTGAGCTGTGTGTGT-----  
CTATGGCAGGTTCTTGGAGCTGCAA  
CAATGGTGAGCAAAACCGGAAGCATCCGGGTGTGTTGAAAGATGATGTTACTTCACCAGGCGGGACTAC  
AATAGCCGGA  
GTTTCATGAAGTGGAGAAAGGTTCTTTCCGTGCAACACTTATGAATGCTGTTGTTGCTGCAGCTAATCGAA  
GCCGTGAACT  
CTCGCAGAGCTAAATTATATAAGAGAGTTAGTTGCATCTATTATTTACCTCACAGATTCACCAAAATAA  
GAGGTTTTGA  
TATT-GCTTTGGTAGATGTGAAAACCTATTTATCTGGTTCC-TAGTTTGG-  
TTCAGATCTCAGCTACTTTGTTA-----  
-----

>Zhong11C

-----  
-----  
-----  
-----  
-----

CAGTCAATAATTTATTTTGGCATGGAGACGCTTCCAATTTCCGCGGAGAGCTTCAAGGTAGG  
GTTTCATCGGAGCTGGAAAGATGGCGGAGAGTATAGCTCGAGGCGTCGTTGCCTCCGGGATGCTTCCTCCG  
AATCACATCT  
CCACCGCCGTTCACTCGAATCTGAATCGCCGTCAAGTCTTCGAGTCCTTTGGCGTCAATGTCTTCTCCAG  
TAGCGAAGAA  
GTAAGTAAATCTTCTTCTCTTTTACATTTCTCTATTTCATTTGTCATTGGAGTAAAACCATGAACTGAGGG  
ATTTTGAAAT  
CTTTTGGCAGGTTGTTAGAGAAAGCGATGTTGTGATCTTCTCTGTGAAACCTCAAGTTGGTATGGTTTCT  
ACATCTCAGT  
TTTATTCTCCATTGAATCATAATCGAATAGAAAATAAAACAATTTGAGATCTATAATCCGTTGATCTGCG  
GAATTTACTT  
AAAGCTGTACCTTGTCTTATGCAGTTAAGAAGGCCATCACGGAAGTAAGGTCAACGCTCTCTAAGGATAA  
GGTTCTTGTT  
TCCGTTGCTGCGGGGATCAAGTTGAAAGATCTTCAGGTTGTCATCTTTGTTGATAAAGGAGTATACTTTG  
TCAGAGAGAT  
CTGTTAGTACAAGTTCATCAGTCCTGAATCATAAGCTCTATGGTTCTATCACTACCCATCAGTGTTTGCA  
TCTAACATGC  
TCCC-TTTGAAACAAAACCTGAAAGATTT-

AATTTTTTGGTCTTTTGCTAGGAATGGTCTGGTCAAGATCGATTCATAAG  
GGTGATGCCTAATACACCAGCTGCAGTTGRTGAGGCAGCTTCAGGTAGTTTCTCCAAGAGTCCCTGTTTG  
TGGTTTATTA  
CTATCAAATGCCTACTGATGATGAAGGTTATGTCTTGTGTGAAACAGTAATGAGCCTTGGAACAGCGGCA  
ACGGAAGAAG  
ACGGAGCACTTGTGACTAGGTTGTTTGGCTCTGTGGGAAGATGTTCAAAGCTGATGAGAAAATGTTTGA  
TGCTGTCACT  
GGTCTCAGGTACGTCACGGTTTCTGAATGTCTTAAGTTGTTCAAGTTACCATCTGAAAATTTTCGATCTT  
GTTACAGTGG  
AAGTGGACCAGCGTACATATTCTTAGCCATTGAAGCTTTAGCTGATGGAGGAGTAGCTGCTGGTTTACCC  
CGAGAACTTG  
CTTTGGGTTTAGCTTCACAGACGGTCAGTCAGCTGACCCATAGGTCCCTCTACAGCTTCTTTAATCTTTT  
TTTTTT-CCA  
AACC-----AAACCTAGAAAGAGAAGCCTGAGCTGTGTGTGT-----  
CTATGGCAGGTTCTTGGAGCTGCAA  
CAATGGTGAGCAAAACCGGAAGCATCCGGGTGTGTTGAAAGATGATGTTACTTCACCAGGCGGGACTAC  
AATAGCCGGA  
GTTTCATGAAGTGGAGAAAGGTTCTTTCCGTGCAACACTTATGAATGCTGTTGTTGCTGCAGCTAATCGAA  
GCCGTGAAGT  
CTCGCAGAGCTAAATTATATAAGAGGGTTAGTTGCATCTATTATTTACCTCACAGATTCACCAAAATAA  
GAGGTTTTGA  
TATT-GCTTTGGTAGATGTGAAAACATTTATCTGGTTCC-TAGTTTGG-  
TTCAGATCTCAGCTACTTTGTAA-----  
-----

>ZiJingYouCai

-----  
-----  
-----  
-----  
-----  
-----  
TCAGTCAATAATTTATTTTGCATGGAGACGCTTCCAATTTCCGCGGAGAGCTTCAAGGTAGG  
GTTTCATCGAGCTGGAAAGATGGCGGAGAGTATAGCTCGAGGCGTCGTTGCCTCCGGGATGCTTCCTCCG  
AATCGCATCT  
CCACCGCCGTTCACTCGAATCTGAATCGCCGTCAAGTCTTCGAGTCCTTTGGCGTCAATGTCTTCTCCAG  
TAGCGAAGAA  
GTAAGTAAATCTTCTTCTTTTACATTTCTCTATTCAATTTGTCATTGGAGTAAAACCATGAACTGAGGG  
ATTTTGAAAT  
CTTTTGGCAGGTTGTTAGAGAAAGCGATGTTGTGATCTTCTCTGTGAAACCTCAAGTTGGTATGGTTTCT  
ACATCTCAGT  
TTTATTCTCCATTGAATCATAATCGAATAGAAAATAAAACAATTTGAGATCTATAATCCGTTGATCTGCG  
GAATTTACTT  
AAAGCTGTACCTTGTCTTATGCAGTTAAGAAGGCCATCACGGAAGTAAGGTCAACGCTCTCTAAGGATAA  
GGTTCTTGTT  
TCCGTTGCTGCGGGGATCAAGTTGAAAGATCTTCAGGTTGTCATCTTTGTTGATAAAGGAGTATACTTTG

TCAGAGAGAT  
CTGTTAGTACAAGTTCATCAGTCCTGAATCATAAGCTCTATGGTTCTATCACTACCCATCAGTGTTCGA  
TCTAACATGC  
TCCC-TTTGAAACAAAATCTGAAAGATT-  
AATTTTTTGGTCTTTTGCTAGGAATGGTCTGGTCAAGATCGATTTCATAAG  
GGTGATGCCTAATACACCAGCTGCAGTTGGTGAGGCAGCTTCAGGTAGTTTCTCCAAGAGTCCCTGTTTG  
TGGTTTATTA  
CTATCAAATGCCTACTGATGATGAAGGTTATGTCTTGTGTGAAACAGTAATGAGCCTTGGAACAGCGGCA  
ACGGAAGAAG  
ACGGAGCACTTGTGACTAGGTTGTTTGGCTCTGTGGGGAAGATGTTCAAAGCTGATGAGAAAATGTTTGA  
TGCTGTCACT  
GGTCTCAGGTACGTACGGTTTCTGAATGTCTTAAGTTGTTCAAGTTACCATCTGAAAATTTTCGATCTT  
GTTACAGTGG  
AAGTGGACCAGCGTACATATTCTTAGCCATTGAAGCTTTAGCTGATGGAGGAGTAGCTGCTGGTTTACCC  
CGAGAACTTG  
CTTTGGGTTTAGCTTCACAGACGGTCAGTCAGCTGACCCATAGGTCCCTCTACAGCTTCTTTAATCTTTT  
TTTTTT-CCA  
AACC-----AAACCTAGAAAGAGAAGCCTGAGCTGTGTGTGT-----  
CTATGGCAGGTTCTTGGAGCTGCAA  
CAATGGTGAGCAAAACCGGAAGCATCCGGGTGTGTGAAAGATGATGTTACTTCACCAGGCGGGACTAC  
AATAGCCGGA  
GTTTCATGAAGTGGAGAAAGGTTCTTTCCGTGCAACACTTATGAATGCTGTTGTTGCTGCAGCTAATCGAA  
GCCGTGAACT  
CTCGCAGAGCTAAATTATATAAGAGAGTTAGTTGCATCTATTATTTACCTCACAGATTCACCAAAATAA  
GAGGTTTTGA  
TATT-GCTTTGGTAGATGTGAAAACATTTTATCTGGTTCC-TAGTTTGG-  
TTCAGATCTCAGCTACTTTGTAA-----

>Hu16

-----  
-----  
-----  
-----  
CAGTCAATAATTTATTTTGGCGATGGAGACGCTTCCAATTTCCGCGGAGAGCTTCAAGGTAGG  
GTTTCATCGGAGCTGGAAGATGGCGGAGAGTATAGCTCGAGGCGTCGTTGCCTCCGGGATGCTTCCTCCG  
AATCGCATCT  
CCACCGCCGTTCACTCGAATCTGAATCGCCGTCAAGTCTTCGAGTCCTTTGGCGTCAATGTCTTCTCCAG  
TAGCGAAGAA  
GTAAGTAAATCTTCTCTCTTTACATTTCTCTATTTCATTGTCATTGGAGTAAAACCATGAACTGAGGG  
ATTTTGAAAT  
CTTTTGGCAGGTTGTTAGAGAAAGCGATGTTGTGATCTTCTCTGTGAAACCTCAAGTTGGTATGGTTTCT  
ACATCTCAGT  
TTTATTCTCCATTGAATCATAATCGAATAGAAAATAAAACAATTTGAGATCTATAATCCGTTGATCTGCG



GAATTTACTT  
AAAGCTGTACCTTGTCTTATGCGGTTAAGAAGGCCATCACGGAAGTAAGGTCAACGCTCTCTAAGGATAA  
GGTTCTTGTT  
TCCGTTGCTGCGGGGATCAAGTTGAAAGATCTTCAGGTTGTCATCTTTGTTGATAAAGGAGTATACTTTG  
TCAGAGAGAT  
CTGTTAGTACAAGTTCATCAGTCCTGAATCATAAGCTCTATGGTTCTATCACTACCCWTCAGTGTTTGCA  
TCTAACATGC  
TCCC-TTTGAAACAAAATCTGAAAGATT-  
AATTTTTTGGTCTTTTGCTAGGAATGGTCTGGTCAAGATCGATTCATAAG  
GGTGATGCCTAATACACCAGCTGCAGTTRGTGAGGCAGCTTCAGGTAGTTTCTCCAAGAGTCCCTGTTTG  
TGGTTTATTA  
CTATCAAATGCCTACTGATGATGAAGGTTATGTCTTGTTGTGAAACAGTAATGAGCCTTGGAACAGCGGCA  
ACGGAAGAAG  
ACGAGCACTTGACTAGGTTGTTTGGCTCTGTGGGAAGATGTTCAAAGCTGATGAGAAAATGTTTGA  
TGCTGTCACT  
GGTCTCAGGTACGTCACGGTTTCTGAATGTCTTAAGTTGTTCAAGTTACCATCTGAAAATTTTCGATCTT  
GTTACAGTGG  
AAGTGGACCAGCGTACATATTCTTAGCCATTGAAGCTTTAGCTGATGGAGGAGTAGCTGCTGGTTTACCC  
CGAGAACTTG  
CTTTGGGTTTAGCTTCACAGACGGTCAGTCAGCTGACCCATAGGTCCCTCTACAGCTTCTTTAATCTTTT  
TTTTTTCCAA  
ACC-----AAACCTAGAAAGAGAAGCCTGAGCTGTGTGTGT-----  
CTATGGCAGGTTCTTGGAGCTGCAA  
CAATGGTGAGCAAAACCGGAAGCATCCGGGTGTGTTGAAAGATGATGTTACTTCACCAGCGGGGACTAC  
AATAGCCGGA  
GTTTCATGAAGTGGAGAAAGGTTCTTTCCGTGCAAACTTATGAATGCTGTTGTTGCTGCAGCTGATCGAA  
GCCGTGAACT  
CTCACAGAGCTAAATTATATAAGAGAGTTAGTTGCATCTATTATTTACCTCACAGATTCACCAAAATAA  
GAGGTTTTGA  
TATTTGCTTTGGTAGATGTGAAAATATTTATCTGGTTCC-TAGTCTGG-  
TTCAGATCTCAGCTACTTTGTTA-----  
-----

>ShanYou28

-----  
-----  
-----  
-----  
-----

TCAGTCAATAATTTATTTTGCATGGAGACGCTTCCAATTTCCGCGGAGAGCTTCAAGGTAGG  
GTTTCATCGGAGCTGGAAAGATGGCGGAGAGTATAGCTCGAGGCGTCGTTGCCTCCGGGATGCTTCCTCCG  
AATCGCATCT  
CCACCGCCGTTCACTCGAATCTGAATCGCCGTCAAGTCTTCGAGTCCTTTGGCGTCAATGTCTTCTCCAG  
TAGCGAAGAA  
GTAAGTAAATCTTCTTCTCTTTTACATTTCTCTATTTCATTTGTCATTGGAGTAAAACCATGAACTGAGGG

ATTTTGAAT  
CTTTGGCAGGTTGTTAGAGAAAGCGATGTTGTGATCTTCTCTGTGAAACCTCAAGTTGGTATGGTTTCT  
ACATCTCAGT  
TTTATTCTCCATTGAATCATAATCGAATAGAAAATAAAACAATTTGAGATCTATAATCCGTTGATCTGCG  
GAATTTACTT  
AAAGCTGTACCTTGTCTTATGCAGTTAAGAAGGCCATCACGGAAGTAAGGTCAACGCTCTCTAAGGATAA  
GGTCTTGTT  
TCCGTTGCTGCGGGGATCAAGTTGAAAGATCTTCAGGTTGTATCTTTGTTGATAAAGGAGTATACTTTG  
TCAGAGAGAT  
CTGTTAGTACAAGTTCATCAGTCCTGAATCATAAGCTCTATGGTTCTATCACTACCCWTCAGTGTTCGA  
TCTAACATGC  
TCCC-TTTGAAACAAAATCTGAAAGATT-  
AATTTTTTGGTCTTTTGCTAGGAATGGTCTGGTCAAGATCGATTCATAAG  
GGTGATGCCTAATACACCAGCTGCAGTTGGTGAGGCAGCTTCAGGTAGTTTCTCCAAGAGTCCCTGTTTG  
TGGTTATTA  
CTATCAAATGCCTACTGATGATGAAGGTTATGTCTTGTGTGAAACAGTAATGAGCCTTGGAACAGCGGCA  
ACGGAAGAAG  
ACGGAGCACTTGTGACTAGGTTGTTTGGCTCTGTGGGAAGATGTTCAAAGCTGATGAGAAAATGTTTGA  
TGCTGTCACT  
GGTCTCAGGTACGTCACGGTTTCTGAATGTCTTAAGTTGTTCAAGTTACCATCTGAAAATTTTCGATCTT  
GTTACAGTGG  
AAGTGGACCAGCGTACATATTCTTAGCCATTGAAGCTTTAGCTGATGGAGGAGTAGCTGCTGGTTTACCC  
CGAGAACTTG  
CTTTGGGTTTAGCTTCACAGACGGTCAGTCAGCTGACCCATAGGTCCCTCTACAGCTTCTTTAATCTTTT  
TTTTTTTCCA  
AACC-----AAACCTAGAAAGAGAAGCCTGAGCTGTGTGTGT-----  
CTATGGCAGGTTCTTGAGCTGCAA  
CAATGGTGAGCAAAACCGGGAAGCATCCGGGTGTGTTGAAAGATGATGTTACTTCACCAGGCGGGACTAC  
AATAGCCGGA  
GTTTCATGAAGTGGAGAAAGGTTCTTTCCGTGCAACACTTATGAATGCTGTTGTTGCTGCAGCTAATCGAA  
GCCGTGAAGT  
CTCGCAGAGCTAAATTATATAAGAGAGTTAGTTGCATCTATTATTTACCTCACAGATTACCAAAATAA  
GAGGTTTTGA  
TATT-GCTTTGGTAGATGTGAAAACATTTATCTGGTTCC-TAGTTTGG-  
TTCAGATCTCAGCTACTTTGTT-----  
-----

>ShanYou107

-----  
-----  
-----  
-----  
-----

CAGTCAATAATTTATTTTGGGATGGAGACGCTTCCAATTTCCGCGGAGAGCTTCAAGGTAGG  
GTTTCATCGGAGCTGGAAAGATGGCGGAGAGTATAGCTCGAGGCGTCTGCTCCGGGATGCTTCCTCCG

AATCGCATCT  
CCACCGCGTTCACTCGAATCTGAATCGCCGTCAAGTCTTCGAGTCCTTTGGCGTCAATGTCTTCTCCAG  
TAGCGAAGAA  
GTAAGTAAATCTTCTTCTCTTTACATTTCTCTATTTCATTTGTCATTGGAGTAAAACCATGAACTGAGGG  
ATTTTGAAAT  
CTTTTGGCAGGTTGTTAGAGAAAGCGATGTTGTGATCTTCTCTGTGAAACCTCAAGTTGGTATGGTTTCT  
ACATCTCAGT  
TTTATTCTCCATTGAATCATAATCGAATAGAAAATAAAACAATTTGAGATCTATAATCCGTTGATCTGCG  
GAATTTACTT  
AAAGCTGTACCTTGTCTTATGCAGTTAAGAAGGCCATCACGGAAGTAAGGTCAACGCTCTCTAAGGATAA  
GGTCTTGTT  
TCCGTTGCTGCGGGGATCAAGTTGAAAGATCTTCAGGTTGTCATCTTTGTTGATAAAGGAGTATACTTTG  
TCAGAGAGAT  
CTGTTAGTACAAGTTCATCAGTCCTGAATCATAAGCTCTATGGTTCTATCACTACCCTTCAGTGTTTGCA  
TCTAACATGC  
TCCC-TTTGAAACAAAATCTGAAAGATTT-  
AATTTTTTGGTCTTTTGCTAGGAATGGTCTGGTCAAGATCGATTCATAAG  
GGTGATGCCTAATACACCAGCTGCAGTTGGTGAGGCAGCTTCAGGTAGTTTCTCCAAGAGTCCCTGTTTG  
TGGTTTATTA  
CTATCAAATGCCTACTGATGATGAAGGTTATGTCTTGTGTGAAACAGTAATGAGCCTTGGAACAGCGGCA  
ACGGAAGAAG  
ACGGAGCACTTGTGACTAGGTTGTTTGGCTCTGTGGGAAGATGTTCAAAGCTGATGAGAAAATGTTTGA  
TGCTGTCACT  
GGTCTCAGGTACGTCACGGTTTCTGAATGTCTTAAGTTGTTCAAGTTACCATCTGAAAATTTTCGATCTT  
GTTACAGTGG  
AAGTGGACCAGCGTACATATTCTTAGCCATTGAAGCTTTAGCTGATGGAGGAGTAGCTGCTGGTTTACCC  
CGAGAACTTG  
CTTTGGGTTTAGCTTCACAGACGGTCAGTCAGCTGACCCATAGGTCCCTCTACAGCTTCTTTAATCTTTT  
TTTTT--CCA  
AACC-----AAACCTAGAAAGAGAAGCCTGAGCTGTGTGTGT-----  
CTATGGCAGGTTCTTGAGCTGCAA  
CAATGGTGAGCAAAACCGGAAGCATCCGGGTGTGTTGAAAGATGATGTTACTTCACCAGCGGGGACTAC  
AATAGCCGGA  
GTTTCATGAAGTGGAGAAAGGTTCTTTCCGTGCAACACTTATGAATGCTGTTGTTGCTGCAGCTAATCGAA  
GCCGTGAACT  
CCCGCAGAGCTAAATTATATAAGAGAGTTAGTTGCATCTATTATTCACCTCACAGATTCACCAAAATAA  
GAGGTTTTGA  
TATT-GCTTTGGTAGATGTGAAAACATTTATCTGGTTCC-TAGTTTGG-  
TTCAGATCTCAGCTACTTTGTTA-----  
-----  
-----  
-----

>CIR

-----  
-----CCCCCCCCAAGAAAATTCATCGA-  
GGAGACGCTTCCAATTTCCGCGGAGAGCTTCAAGGTAGG  
GTTTCATCGGAGCTGGAAGATGGCGGAGAGTATAGCTCGAGGCGTCGTTGCCTCCGGGATGCTTCCTCCG  
AATCGCATCT  
CCACCGCGGTTCACTCGAATCTGAATCGCCGTCAAGTCTTCGAGTCCTTTGGCGTCAATGTCTTCTCCAG  
TAGCGAAGAA  
GTAAGTAAATCTTCTCTCTTTACATTTCTCTATTTCATTTGTCATTGGAGTAAAACCATGAACTGAGGG  
ATTTTGAAAT  
CTTTTGGCAGGTTGTTAGAGAAAGCGATGTTGTGATCTTCTCTGTGAAACCTCAAGTTGGTATGGTTTCT  
ACATCTCAGT  
TTTATTCTCCATTGAATCATAATCGAATAGAAAATAAAACAATTTGAGATCTATAATCCGTTGATCTGCG  
GAATTTACTT  
AAAGCTGTACCTTGTCTTATGCAGTTAAGAAGGCCATCACGGAAGTAAGGTCAACGCTCTCTAAGGATAA  
GGTCTTGTT  
TCCGTTGCTGCGGGGATCAAGTTGAAAGATCTTCAGGTTGTCATCTTTGTTGATAAAGGAGTATACTTTG  
TCAGAGAGAT  
CTGTTAGTACAAGTTCATCAGTCCTGAATCATAAGCTCTATGTTCTATCACTACCCATCAGTGTTTGCA  
TCTAACATGC  
TCCC-  
TTTGAAACAAAATCTGAAAGATTTAATTTTTTTGGTCTTTTGCTAGGAATGGTCTGGTCAAGATCGATT  
ATAAG  
GGTGATGCCTAATACACCAGCTGCAGTTGGTGAGGCAGCTTCAGGTAGTTTCTCCAAGAGTCCCTGTTTG  
TGGTTTATTA  
CTATCAAATGCCTACTGATGATGAAGTTATGTCTTGTGTGAAACAGTAATGAGCCTTGGAACAGCGGCA  
ACGGAAGAAG  
ACGGAGCACTTGTGACTAGGTTGTTTGGCTCTGTGGGAAGATGTTCAAAGCTGATGAGAAAATGTTTGA  
TGCTGTCACT  
GGTCTCAGGTACGTCACGGTTTCTGAATGTCTTAAGTTGTTCAAGTTACCATCTGAAAATTTTCGATCTT  
GTTACAGTGG  
AAGTGGACCAGCGTACATATTCTTAGCCATTGAAGCTTTAGCTGATGGAGGAGTAGCTGCTGGTTTACCC  
CGAGAACTTG  
CTTTGGGTTTAGCTTCACAGACGGTCAGTCAGCTGACCCATAGGTCCCTCTACAGCTTCTTTAATCTTTT  
TTTTTT-CCA  
AACC-----AAACCTAGAAAGAGAAGCCTGAGCTGTGTGTGT-----  
CTATGGCAGGTTCTTGGAGCTGCAA  
CAATGGTGAGCAAAACCGGAAGCATCCGGGTGTGTTGAAAGATGATGTTACTTCACCAGGCGGGACTAC  
AATAGCCGGA  
GTTTCATGAAGTGGAGAAAGGTTCTTTCCGTGCAAACTTATGAATGCTGTTGTTGCTGCAGCTAATCGAA  
GCCGTGAACT  
CTCGCAGAGCTAAATTATATAAGAGAGTTAGTTGCATCTATTATTTACCTCACAGATTACCAAAAATAA  
GAGGTTTTGA  
TATT-GCTTTGGTAGATGTGAAAATAT--A--TCGTCC-----  
-----

-----  
>QingCaiR  
-----  
-----  
-----  
-----  
-----

TCAAAGAAAAAACA AAAAATCATCGATGGAGACGCTTCCAATTTCCGCGGAGAGCTTCAAGGTAGG  
GTTTCATCGGAGCTGGAAAGATGGCGGAGAGTATAGCTCGAGGCGTCGTTGCCTCCGGGATGCTTCCTCCG  
AATCGCATCT  
CCACCGCCGTTCACTCGAATCTGAATCGCCGTCAAGTCTTCGAGTCCTTTGGCGTCAATGTCTTCTCCAG  
TAGCGAAGAA  
GTAAGTAAATCTTCTCTCTTTACATTTCTCTATTTCATTGTGATTGGAGTAAAACCATGAACTGAGGG  
ATTTTGAAAT  
CTTTTGGCAGGTTGTTAGAGAAAGCGATGTTGTGATCTTCTCTGTGAAACCTCAAGTTGGTATGGTTTCT  
ACATCTCAGT  
TTTATTCTCCATTGAATCATAATCGAATAGAAAATAAAACAATTTGAGATCTATAATCCGTTGATCTGCG  
GAATTTACTT  
AAAGCTGTACCTTGTCTTATGCAGTTAAGAAGGCCATCACGGAAGTAAGGTCAACGCTCTCTAAGGATAA  
GGTTCTTGTT  
TCCGTTGCTGCGGGGATCAAGTTGAAAGATCTTCAGGTTGTCATCTTTGTTGATAAAGGAGTATACTTTG  
TCAGAGAGAT  
CTGTTAGTACAAGTTCATCAGTCTCTGAATCATAAGCTCTATGGTTCTATCACTACCCATCAGTGTTTGCA  
TCTAACATGC  
TCCC-TTTGAAACAAAATCTGAAAGATT-  
AATTTTTTGGTCTTTTGCTAGGAATGGTCTGGTCAAGATCGATTCATAAG  
GGTGATGCCTAATACACCAGCTGCAGTTGGTGAGGCAGCTTCAGGTAGTTTCTCCAAGAGTCCCTGTTTG  
TGGTTTATTA  
CTATCAAATGCCTACTGATGATGAAGGTTATGTCTTGTTGTGAAACAGTAATGAGCCTTGGAACAGCGGCA  
ACGGAAGAAG  
ACGAGCACTTGACTAGGTTGTTTGGCTCTGTGGGAAGATGTTCAAAGCTGATGAGAAAATGTTTGA  
TGCTGTCACT  
GGTCTCAGGTACGTACGGTTTCTGAATGTCTTAAGTTGTTCAAGTTACCATCTGAAAATTTTCGATCTT  
GTTACAGTGG  
AAGTGGACCAGCGTACATATTCTTAGCCATTGAAGCTTTAGCTGATGGAGGAGTAGCTGCTGGTTTACCC  
CGAGAACTTG  
CTTTGGGTTTAGCTTCACAGACGGTCAGTCAGCTGACCCATAGGTCCCTCTACAGCTTCTTTAATCTTTT  
TTTTTT-CCA  
AACC-----AAACCTAGAAAGAGAAGCCTGAGCTGTGTGTGT-----  
CTATGGCAGGTTCTTGGAGCTGCAA  
CAATGGTGAGCAAAACCGGAAGCATCCGGGTGTGTTGAAAGATGATGTTACTTCACCAGGCGGGACTAC  
AATAGCCGA  
GTTTCATGAAGTGGAGAAAGGTTCTTTCCGTGCAACACTTATGAATGCTGTTGTTGCTGCAGCTAATCGAA  
GCCGTGAAGT

CTCGCAGAGCTAAATTATATAAGAGAGTTAGTTGCATCTATTATTTACCTCACAGATTCACCAAAATAA  
GAGGTTTTGA  
TATT-GCTTTGGTAGATGTGAAAACATTTATCTGGTTCC-TAGTTTGG-  
TTCAGATCTCAGTTATATTTGTAAAGGGA

-----  
>ChuanZa

-----GCAACGCAATTTAATGTGAGTTAGCTCACTCATTAGGGCACCCAGG-CTTTACACTT-  
TATGCTTTCCGGCTC  
GTATGTTGTGTGGAAATTGTGAGCGGATAACAATTTACACAGGAAACAGCTATGACCCATGATTACGCC  
AAGCTTGCAT  
GCCTGCAGGTCGACGATTCACTCAATAATTTATTTTGGCATGGAGACGCTTCCAATTTCCGCGGAGAGCT  
TCAAGGTAGG  
GTTTCATCGGAGCTGGAAAGATGGCGGAGAGTATAGCTCGAGGCGTCGTTGCCTCCGGGATGCTTCCTCCG  
AATCGCATCT  
CCACCGCCGTTCACTCGAATCTGAATCGCCGTCAAGTCTTCGAGTCCCTTGGCGTCAATGTCTTCTCCAG  
TAGCGAAGAA  
GTAAGTAAATCTTCTTCTCTTTTACATTTCTCTATTTCATTTGTCATTGGAGTAAAACCATGAACTGAGGG  
ATTTTGAAAT  
CTTTTGGCAGGTTGTTAGAGAAAGCGATGTTGTGATCTTCTCTGTGAAACCTCAAGTTGGTATGGTTTCT  
ACATCTCAGT  
TTTATTCTCCATTGAATCATAATCGAATAGAAAATAAAACAATTTGAGATCTATAATCCGTTGATCTGCG  
GAATTTACTT  
AAAGCTGTACCTTGTCTTATGCAGTTAAGAAGGCCATCACGGAAGTAAGGTCAACGCTCTCTAAGGATAA  
GGTTCTTGTT  
TCCGTTGCTGCGGGGATCAAGTTGAAAGATCTTCAGGTTGTCATCTTTGTTGATAAAGGAGTATACTTTG  
TCAGAGAGAT  
CTGTTAGTACAAGTTCATCAGTCTGAATCATAAGCTCTATGGTTCTATCACTACCCATCAGTGTGTTGCA  
TCTAACATGC  
TCCCCTTTGAAACAAAATCTGAAAGATTT-  
AATTTTTTGGTCTTTTGCTAGGAATGGTCTGGTCAAGATCGATTCATAAG  
GGTGATGCCTAATACACCAGCTGCAGTTGGTGAGGCAGCTTCAGGTAGTTTCTCCAAGAGTCCCTGTTTG  
TGGTTTATTA  
CTATCAAATGCCTACTGATGATGAAGGTTATGTCTTGTGTGAAACAGTAATGAGCCTTGGAACAGCGGCA  
ACGGAAGAAG  
ACGGAGCACTTGTGACTAGGTTGTTTGGCTCTGTGGGGAAGATGTTCAAAGCTGATGAGAAAATGTTTGA  
TGCTGTCACT  
GGTCTCAGGTACGTCACGGTTTCTGAATGTCTTAAGTTGTTCAAGTTACCATCTGAAAATTTTCGATCTT  
GTTACAGTGG  
AAGTGGACCAGCGTACATATTCTTAGCCATTGAAGCTTTAGCTGATGGAGGAGTAGCTGCTGGTTTACCC  
CGAGAACTTG  
CTTTGGGTTTAGCTTCACAGACGGTCAGTCAGCTGACCCATAGGTCCCTCTACAGCTTCTTTAATCTTTT  
TTTTTT-CCA  
AACC-----AAACCTAGAAAAGAGAAGCCTGAGCTGTGTGTGT-----  
CTATGGCAGGTTCTTGAGCTGCAA

CAATGGTGAGCAAAGCCGGGAAGCATCCGGGTGTGTTGAAAGATGATGTTACTTCACCAGGCGGGACTAC  
AATAGCCGGA  
GTTTCATGAAGTGGAGAAAGGTTCTTTCCGTGCAACACTTATGAATGCTGTTGTTGCTGCAGCTAATCGAA  
GCCGTGAAGT  
CTCGCAGAGCTAAATTATATAAGAGAGTTAGTTGCATCTATTATTTACCTCACAGATTACCAAAATAA  
GAGGTTTTGA  
TATT-GCTTTGGTAGATGTGAAAACATTTATCTGGTTCC-TAGTTTGG-  
TTCAGATCTCAGCTACTTTGTTATCGTCGA  
CCTGC-AGGCATGCAAGCTTGGCGTAA---  
>HanYou8

-----CCCCCCCCCAAAATTTTCATCGA-  
GGAGACGCTTCCAATTTCCGCGGAGAGCTTCAAGGTAGG  
GTTTCATCGGAGCTGGAAAGATGGCGGAGAGTATAGCTCGAGGCGTCGTTGCCTCCGGGATGCTTCCTCCG  
AATCGCATCT  
CCACCGCCGTTCACTCGAATCTGAATCGCCGTCAAGTCTTCGAGTCCTTTGGCGTCAATGTCTTCTCCAG  
TAGCGAAGAA  
GTAAGTAAATCTTCTCTCTTTACATTTCTCTATTCAATTTGTCATTGGAGTAAAACCATGAACTGAGGG  
ATTTTGAAAT  
CTTTTGGCAGGTTGTTAGAGAAAGCGATGTTGTGATCTTCTCTGTGAAACCTCAAGTTGGTATGGTTTCT  
ACATCTCAGT  
TTTATTCTCCATTGAATCATAATCGAATAGAAAATAAAACAATTTGAGATCTATAATCCGTTGATCTGCG  
GAATTTACTT  
AAAGCTGTACCTTGTCTTATGCAGTTAAGAAGGCCATCACGGAAGTAAGGTCAACGCTCTCTAAGGATAA  
GGTTCTTGTT  
TCCGTTGCTGCGGGGATCAAGTTGAAAGATCTTCAGGTTGTCATCTTTGTTGATAAAGGAGTATACTTTG  
TCAGAGAGAT  
CTGTTAGTACAAGTTCATCAGTCCTGAATCATAAGCTCTATGGTTCTATCACTACCCATCAGTGTTCGA  
TCTAACATGC  
TCCC-  
TTTGAAACAAAATCTGAAAAGATTTAATTTTTTGGTCTTTTGCTAGGAATGGTCTGGTCAAGATCGATTC  
ATAAG  
GGTGATGCCTAATACACCAGCTGCAGTTGGTGAGGCAGCTTCAGGTAGTTTCTCCAAGAGTCCCTGTTTG  
TGGTTTATTA  
CTATCAAATGCCTACTGATGATGAAGGTTATGTCTTGTGTGAAACAGTAATGAGCCTTGGAACAGCGGCA  
ACGGAAGAAG  
ACGGAGCACTTGTGACTAGGTTGTTTGGCTCTGTGGGAAGATGTTCAAAGCTGATGAGAAAATGTTTGA  
TGCTGTCACT  
GGTCTCAGGTACGTCACGGTTTCTGAATGTCTTAAGTTGTTCAAGTTACCATCTGAAAATTTTCGATCTT  
GTTACAGTGG  
AAGTGACCAGCGTACATATTCTTAGCCATTGAAGCTTTAGCTGATGGAGGAGTAGCTGCTGGTTTACCC

CGAGAACTTG  
CTTTGGGTTTAGCTTCACAGACGGTCAGTCAGCTGACCCATAGGTCCTCTACAGCTTCTTTAATCTTTT  
TTTTTT-CCA  
AACC-----AAACCTAGAAAGAGAAGCCTGAGCTGTGTGTGT-----  
CTATGGCAGGTTCTTGGAGCTGCAA  
CAATGGTGAGCAAAACCGGGAAGCATCCGGGTGTGTTGAAAGATGATGTTACTTCACCAGGCGGGACTAC  
AATAGCCGGA  
GTTTCATGAAGTGGAGAAAGGTTCTTTCCGTGCAACACTTATGAATGCTGTTGTTGCTGCAGCTAATCGAA  
GCCGTGAACT  
CTCGCAGAGCTAAATTATATAAGAGAGTTAGTTGCATCTATTATTTACCTCACAGATTCACCAAAATAA  
GAGGTTTTGA  
TATT-GCTTTGGTAGATGTGAAAATAT--AATCTGTCTA-AGGT-----  
-----  
-----

>Nan12R  
----GCGCAACGCAATT-AATGTGAGTTAGCTCACTCATTAGGGCACCCAGGGCTTTACACTT-  
TATGCTTCCGGGCTC  
GTATGTTGTGTGGAA-TTGTGAGCGGATAACAATTTACACAGGAAACAGCTATGACC-  
ATGATTACGCCAAGCTTGCAT  
GCCTGCAGGTCGACGATTCAAGTCAATAATTTATTTTGGATGGAGACGCTTCCAATTTCCGCGGAGAGCT  
TCAAGGTAGG  
GTTTCATCGAGCTGGAAAGATGGCGGAGAGTATAGCTCGAGGCGTCGTTGCCTCCGGGATGCTTCCTCCG  
AATCGCATCT  
CCACCGCCGTTCACTCGAATCTGAATCGCCGTCAAGTCTTCGAGTCCTTTGGCGTCAATGTCTTCTCCAG  
TAGCGAAGAA  
GTAAGTAAATCTTCTTCTTTTACATTTCTCTATTCAATTTGTCATTGGAGTAAAACCATGAACTGAGGG  
ATTTTGAAAT  
CTTTTGGCAGGTTGTTAGAGAAAGCGATGTTGTGATCTTCTCTGTGAAACCTCAAGTTGGTATGGTTTCT  
ACATCTCAGT  
TTTATTCTCCATTGAATCATAATCGAATAGAAAATAAAACAATTTGAGATCTATAATCCGTTGATCTGCG  
GAATTTACTT  
AAAGCTGTACCTTGTCTTATGCAGTTAAGAAGGCCATCACGGAAGTAAGGTCAACGCTCTCTAAGGATAA  
GGTTCTTGTT  
TCCGTTGCTGCGGGGATCAAGTTGAAAGATCTTCAGGTTGTCATCTTTGTTGATAAAGGAGTATACTTTG  
TCAGAGAGAT  
CTGTTAGTACAAGTTCATCAGTCCTGAATCATAAGCTCTATGGTTCTATCACTACCCATCAGTGTTCGA  
TCTAACATGC  
TCCC-TTTGAAACAAAATCTGAAAGATTT-  
AATTTTTTGGTCTTTTGCTAGGAATGGTCTGGTCAAGATCGATTCATAAG  
GGTGATGCCTAATACACCAGCTGCAGTTGGTGAGGCAGCTTCAGGTAGTTTCTCCAAGAGTCCCTGTTTG  
TGGTTTATTA  
CTATCAAATGCCTACTGATGATGAAGGTTATGTCTGTGTGAAACAGTAATGAGCCTTGGAACAGCGGCA  
ACGGAAGAAG  
ACGGAGCACTGTTGCTAAGTTGTTTGGCTCTGTGGGAAGATGTTCAAAGCTGATGAGAAAATGTTTGA



TGCTGTCACT  
GGTCTCAGGTACGTACGGTTTCTGAATGTCTTAAGTTGTTCAAGTTACCATCTGAAAATTTTCGATCTT  
GTTACAGTGG  
AAGTGGACCAGCGTACATATTCTTAGCCATTGAAGCTTTAGCTGATGGAGGAGTAGCTGCTGGTTTACCC  
CGAGAACTTG  
CTTTGGGTTTAGCTTCACAGACGGTCAGTCAGCTGACCCATAGGTCCCTCTACAGCTTCTTTAATCTTTT  
TTTTTT-CCA  
AACC-----AAACCTAGAAAGAGAAGCCTGAGCTGTGTGTGT-----  
CTATGGCAGGTCTTGGAGCTGCAA  
CAATGGTGAGCAAAACCGGAAGCATCCGGGTGTGTTGAAAGATGATGTTACTTCACCAGGCGGGACTAC  
AATAGCCGGA  
GTTTCATGAAGTGGAGAAAGGTTCTTTCCGTGCAACACTTATGAATGCTGTTGTTGCTGCAGCTAATCGAA  
GCCGTGAACT  
CTCGCAGAGCTAAATTATATAAGAGAGTTAGTTGCATCTATTATTTACCTCACAGATTCACCAAAATAA  
GAGGTTTTGA  
TATT-GCTTTGGTAGATGCGAAAACTATTTATCTGGTTCC-TAGTTTGG-  
TTCAGATCTCAGCTAGTTTGTTAAATCTCT  
AGAGG-ATCCCCGGGTACCGA-----  
>ZhongYou821  
GCAACTGTTGGGAAGGGCGATCGGTGCGGGCCTCTTCGCTATTACGCCAGCTGGCGAAAGGGGGATGTGC  
TGCAAGGCGA  
TTAAGTTGGGTAA-----  
CGCCAGGGTTTTCCAGTCACGACGTTGTAAAACGACGGCCAGTGAATTCGAGCTCGGTACCC  
GGGGATCCTCTAGAGATTCAGTCAATAATTTATTTTGCATGGAGACGCTTCCAATTTCCGCGGAGAGCT  
TCAAGGTAGG  
GTTTCATCGGAGCTGGAAAGATGGCGAAGAGTATAGCTCGAGGCGTCGTTGCCTCCGGGATGCTTCCTCCG  
AATCGCATCT  
CCACCGCCGTTCACTCGAATCTGAATCGCCGTCAAGTCTTCGAGTCCTTTGGCGTCAATGTCTTCTCCAG  
TAGCGAAGAA  
GTAAGTAAATCTTCTTCTTTTACATTTCTCTATTCAATTTGTCATTGGAGTAAAACCATGAACTGAGGG  
ATTTTGAAAT  
CTTTTGGCAGGTTGTTAGAGAAAGCGATGTTGTGATCTTCTCTGTGAAACCTCAAGTTGGTATGGTTTCT  
ACATCTCAGT  
TTTATTCTCCATTGAATCATAATCGAATAGAAAATAAAACAATTTGAGATCTATAATCCGTTGATCTGCG  
GAATTTACTT  
AAAGCTGTACCTTGTCTTATGCAGTTAAGAAGGCCATCACGGAAGTAAGGTCAACGCTCTCTAAGGATAA  
GGTTCTTGTT  
TCCGTTGCTGCGGGGATCAAGTTGAAAGATCTTCAGGTTGTCATCTTTGTTGATAAAGGAGTATACTTTG  
TCAGAGAGAT  
CTGTTAGTACAAGTTCATCAGTCCTGAATCATAAGCTCTATGGTTCTATCACTACCCATCAGTGTTCGCA  
TCTAACATGC  
TCCC-TTTGAAACAAAATCTGAAAGATT-  
AATTTTTTGGTCTTTTGCTAGGAATGGTCTGGTCAAGATCGATTCATAAG  
GGTGATGCCTAATACACCAGCTGCAGTTGGTGAGGCAGCTTCAGGTAGTTTCTCCAAGAGTCCCTGTTTG

TGGTTTATTA  
CTATCAAATGCCTACTGATGATGAAGGTTATGTCTTGTGTGAAACAGTAATGAGCCTTGGAACAGCGGCA  
ACGGAAGAAG  
ACGGAGCACTTGTGACTAGGTTGTTTGGCTCTGTGGGAAGATGTTCAAAGCTGATGAGAAAATGTTTGA  
TGCTGTCACT  
GGTCTCAGGTACGTACGGTTTCTGAATGTCTTAAGTTGTTCAAGTTACCATCTGAAAATTTTCGATCTT  
GTTACAGTGG  
AAGTGGACCAGCGTACATATTCTTAGCCATTGAAGCTTTAGCTGATGGAGGAGTAGCTGCTGGTTTACCC  
CGAGAACTTG  
CTTTGGGTTTAGCTTCACAGACGGTCAGTCAGCTGACCCATAGGTCCCTCTACAGCTTCTTTAATCTTTT  
TTTTTT-CCA  
AACC-----AAACCTAGAAAGAGAAGCCTGAGCTGTGTGTGT-----  
CTATGGCAGGTTCTTGGAGCTGCAA  
CAATGGTGAGCAAAACCGGAAGCATCCGGGTGTGTTGAAAGATGATGTTACTTCACCAGCGGGACTAC  
AATAGCCGGA  
GTTTCATGAAGTGGAGAAAGGTTCTTTCCGTGCAACACTTATGAATGCTGTTGTTGCTGCAGCTAATCGAA  
GCCGTGAACT  
CTCGCAGAGCTAAATTATATAAGAGAGTTAGTTGCATCTATTATTTACCTCACAGATTCACCAAAATAA  
GAGGTTTTGA  
TATT-  
GCTTTGGTAGATGTGAAAATATTTATCTGGTTCCTAGTTTGGGTTTCAGATCTCAGCTACTTTGTAA  
TCTCT  
AGAGGCATCCCCGGGTAC-----
