# Supplementary material for: SNP and Haplotype Variability in the BnP5CR2 Gene and Association with Resistance and Susceptible Cultivars for Sclerotinia sclerotiorum in Brassica napus
Source: MDPI journal article supplement (doi:10.3390/agronomy12122956), 2022-11-25
Supplement: s1 [file s1]

>ZS11

ATGGAGACGCTTCCAATTTCCGCGGAGAGCTTCAAGGTAGGGTTCATCGGAGCTGGAAAGATGGCGGAGA  
GTATAGCTCGAGGCGTCGTTGCCTCCGGGATGCTTCCTCCGAATCGCATCTCCACCGCCGTTCACTCGAA  
TCTGAATCGCCGTC AAGTCTTCGAGTCCTTTGGCGTCAATGTCTTCTCCAGTAGCGAAGAAGTTGTTAGA  
GAAAGCGATGTTGTGATCTTCTCTGTGAAACCTCAAGTTGTTAAGAAGGCCATCACGGAAGTAAGGTCAA  
CGCTCTCTAAGGATAAGGTTCTTGTTCGTTGCTGCGGGGATCAAGTTGAAAGATCTTCAGGAATGGTC  
TGGTCAAGATCGATT CATAAGGGTGATGCCTAATACACCAGCTGCAGTTGGTGAGGCAGCTTCAGTAATG  
AGCCTTGGAACAGCGGCAACGGAAGAAGACGGAGCACTTGTGACTAGGTTGTTTGGCTCTGTGGGGAAGA  
TGTTCAAAGCTGATGAGAAAATGTTTGATGCTGTCACTGGTCTCAGTGGAAGTGGACCAGCGTACATATT  
CTTAGCCATTGAAGCTTTAGCTGATGGAGGAGTAGCTGCTGGTTTACCCCGAGAACTTGCTTTGGGTTTA  
GCTTCACAGACGGTCAGTCAGCTGACCCATAGGTTCTTGAGCTGCAACAATGGTGA

>ChuanYou36

ATGGAGACGCTTCCAATTTCCGCGGAGAGCTTCAAGGTAGGGTTCATCGGAGCTGGAAAGATGGCGGAGA  
GTATAGCTCGAGGCGTCGTTGCCTCCGGGATGCTTCCTCCGAATCGCATCTCCACCGCCGTTCACTCGAA  
TCTGAATCGCCGTC AAGTCTTCGAGTCCTTTGGCGTCAATGTCTTCTCCAGTAGCGAAGAAGTTGTTAGA  
GAAAGCGATGTTGTGATCTTCTCTGTGAAACCTCAAGTTGTTAAGAAGGCCATCACGGAAGTAAGGTCAA  
CGCTCTCTAAGGATAAGGTTCTTGTTCGTTGCTGCGGGGATCAAGTTGAAAGATCTTCAGGAATGGTC  
TGGTCAAGATCGATT CATAAGGGTGATGCCTAATACACCAGCTGCAGTTGGTGAGGCAGCTTCAGTAATG  
AGCCTTGGAACAGCGGCAACGGAAGAAGACGGAGCACTTGTGCTAAGTTGTTTGGCTCTGTGGGGAAGA  
TGTTCAAAGCTGATGAGAAAATGTTTGATGCTGTCACTGGTCTCAGTGGAAGTGGACCAGCGTACATATT  
CTTAGCCATTGAAGCTTTAGCTGATGGAGGAGTAGCTGCTGGTTTACCCCGAGAACTTGCTTTGGGTTTA  
GCTTCACAGACGGTCAGTGAAGTGAACCATGGTGCTTGAGCTGCAACAATGGTGA

>NQ2107

ATGGAGACGCTTCCAATTTCCGCGGAGAGCTTCAAGGTAGGGTTCATCGGAGCTGGAAAGATGGCGGAGA  
GTATAGCTCGAGGCGTCGTTGCCTCCGGGATGCTTCCTCCGAATCGCATCTCCACCGCCGTTCACTCGAA  
TCTGAATCGCCGTC AAGTCTTCGAGTCCTTTGGCGTCAATGTCTTCTCCAGTAGCGAAGAAGTTGTTAGA  
GAAAGCGATGTTGTGATCTTCTCTGTGAAACCTCAAGTTGTTAAGAAGGCCATCACGGAAGTAAGGTCAA  
CGCTCTCTAAGGATAAGGTTCTTGTTCGTTGCTGCGGGGATCAAGTTGAAAGATCTTCAGGAATGGTC  
TGGTCAAGATCGATT CATAAGGGTGATGCCTAATACACCAGCTGCAGTTGGTGAGGCAGCTTCAGTAATG  
AGCCTTGGAACAGCGGCAACGGAAGAAGACGGAGCACTTGTGCTAAGTTGTTTGGCTCTGTGGGGAAGA  
TGTTCAAAGCTGATGAGAAAATGTTTGATGCTGTCACTGGTCTCAGTGGAAGTAGACCAGCGTACATATT  
CTTAGCCATTGAAGCTTTAGCTGATGGAGGAGTAGCTGCTGGTTTACCCCGAGAACTTGCTTTGGGTTTA  
GCTTCACAGACGGTCAGTGAAGTGAACCATGGTGCTTGAGCTGCAACAATGGTGA

>GuoHaoYou5

ATGGAGACGCTTCCAATTTCCGCGGAGAGCTTCAAGGTAGGGTTCATCGGAGCTGGAAAGATGGCGGAGA  
GTATAGCTCGAGGCGTCGTTGCCTCCGGGATGCTTCCTCCGAATCGCATCTCCACCGCCGTTCACTCGAA  
TCTGAATCGCCGTC AAGTCTTCGAGTCCTTTGGCGTCAATGTCTTCTCCAGTAGCGAAGAAGTTGTTAGA  
GAAAGCGATGTTGTGATCTTCTCTGTGAAACCTCAAGTTGTTAAGAAGGCCATCACGGAAGTAAGGTCAA  
CGCTCTCTAAGGATAAGGTTCTTGTTCGTTGCTGCGGGGATCAAGTTGAAAGATCTTCAGGAATGGTC  
TGGTCAAGATCGATT CATAAGGGTGATGCCTAATACACCAGCTGCAGTTGGTGAGGCAGCTTCAGTAATG  
AGCCTTGGAACAGCGGCAACGGAAGAAGACGGAGCACTTGTGCTAAGTTGTTTGGCTCTGTGGGGAAGA  
TGTTCAAAGCTGATGAGAAAATGTTTGATGCTGTCACTGGTCTCAGTGGAAGTGGACCAGCGTACATATT  
CTTAGCCATTGAAGCTTTAGCTGATGGAGGAGTAGCTGCTGGTTTACCCCGAGAACTTGCTTTGGGTTTA  
GCTTCACAGACGGTCAGTGAAGTGAACCATGGTGCTTGAGCTGCAACAATGGTGA

>QinYou28

ATGGAGACGCTTCCAATTTCCGCGGAGAGCTTCAAGGTAGGGTTCATCGGAGCTGGAAAGATGGCGGAGA  
GTATAGCTCGAGGCGTCGTTGCCTCCGGGATGCTTCCTCCGAATCGCATCTCCACCGCCGTTCACTCGAA  
TCTGAATCGCCGTCAAGTCTTCGAGTCCTTTGGCGTCAATGTCTTCTCCAGTAGCGAAGAAGTTGTTAGA  
GAAAGCGATGTTGTGATCTTCTCTGTGAAACCTCAAGTTGTTAAGAAGGCCATCACGGAAGTAAGGTCAA  
CGCTCTCTAAGGATAAGGTTCTTGTTCGTTGCTGCGGGGATCAAGTTGAAAGATCTTCAGGAATGGTC  
TGGTCAAGATCGATTCTATAAGGGTGATGCCTAATACACCAGCTGCAGTTGGTGAGGCAGCTTCAGTAATG  
AGCCTTGGAACAGCGGCAACGGAAGAAGACGGAGCACTTGTGACTAGGTTGTTTGGCTCTGTGGGGAAGA  
TGTTCAAAGCTGATGAGAAAATGTTTGATGCTGTCACTGGTCTCAGTGGAAGTGGACCAGCGTACATATT  
CTTAGCCATTGAAGCTTTAGCTGATGGAGGAGTAGCTGCTGGTTTACCCCGAGAACTTGCTTTGGGTTTA  
GCTTCACAGACGGTCAGTCAGCTGACCCATAGGTTCTTGAGCTGCAACAATGGTGA

>Zhong11C

ATGGAGACGCTTCCAATTTCCGCGGAGAGCTTCAAGGTAGGGTTCATCGGAGCTGGAAAGATGGCGGAGA  
GTATAGCTCGAGGCGTCGTTGCCTCCGGGATGCTTCCTCCGAATCACATCTCCACCGCCGTTCACTCGAA  
TCTGAATCGCCGTCAAGTCTTCGAGTCCTTTGGCGTCAATGTCTTCTCCAGTAGCGAAGAAGTTGTTAGA  
GAAAGCGATGTTGTGATCTTCTCTGTGAAACCTCAAGTTGTTAAGAAGGCCATCACGGAAGTAAGGTCAA  
CGCTCTCTAAGGATAAGGTTCTTGTTCGTTGCTGCGGGGATCAAGTTGAAAGATCTTCAGGAATGGTC  
TGGTCAAGATCGATTCTATAAGGGTGATGCCTAATACACCAGCTGCAGTTGGTGAGGCAGCTTCAGTAATG  
AGCCTTGGAACAGCGGCAACGGAAGAAGACGGAGCACTTGTGACTAGGTTGTTTGGCTCTGTGGGGAAGA  
TGTTCAAAGCTGATGAGAAAATGTTTGATGCTGTCACTGGTCTCAGTGGAAGTGGACCAGCGTACATATT  
CTTAGCCATTGAAGCTTTAGCTGATGGAGGAGTAGCTGCTGGTTTACCCCGAGAACTTGCTTTGGGTTTA  
GCTTCACAGACGGTCAGTCAGCTGACCCATAGGTTCTTGAGCTGCAACAATGGTGA

>ZiJingYouCai

ATGGAGACGCTTCCAATTTCCGCGGAGAGCTTCAAGGTAGGGTTCATCGGAGCTGGAAAGATGGCGGAGA  
GTATAGCTCGAGGCGTCGTTGCCTCCGGGATGCTTCCTCCGAATCGCATCTCCACCGCCGTTCACTCGAA  
TCTGAATCGCCGTCAAGTCTTCGAGTCCTTTGGCGTCAATGTCTTCTCCAGTAGCGAAGAAGTTGTTAGA  
GAAAGCGATGTTGTGATCTTCTCTGTGAAACCTCAAGTTGTTAAGAAGGCCATCACGGAAGTAAGGTCAA  
CGCTCTCTAAGGATAAGGTTCTTGTTCGTTGCTGCGGGGATCAAGTTGAAAGATCTTCAGGAATGGTC  
TGGTCAAGATCGATTCTATAAGGGTGATGCCTAATACACCAGCTGCAGTTGGTGAGGCAGCTTCAGTAATG  
AGCCTTGGAACAGCGGCAACGGAAGAAGACGGAGCACTTGTGACTAGGTTGTTTGGCTCTGTGGGGAAGA  
TGTTCAAAGCTGATGAGAAAATGTTTGATGCTGTCACTGGTCTCAGTGGAAGTGGACCAGCGTACATATT  
CTTAGCCATTGAAGCTTTAGCTGATGGAGGAGTAGCTGCTGGTTTACCCCGAGAACTTGCTTTGGGTTTA  
GCTTCACAGACGGTCAGTCAGCTGACCCATAGGTTCTTGAGCTGCAACAATGGTGA

>Hu16

ATGGAGACGCTTCCAATTTCCGCGGAGAGCTTCAAGGTAGGGTTCATCGGAGCTGGAAAGATGGCGGAGA  
GTATAGCTCGAGGCGTCGTTGCCTCCGGGATGCTTCCTCCGAATCGCATCTCCACCGCCGTTCACTCGAA  
TCTGAATCGCCGTCAAGTCTTCGAGTCCTTTGGCGTCAATGTCTTCTCCAGTAGCGAAGAAGTTGTTAGA  
GAAAGCGATGTTGTGATCTTCTCTGTGAAACCTCAAGTTGTTAAGAAGGCCATCACGGAAGTAAGGTCAA  
CGCTCTCTAAGGATAAGGTTCTTGTTCGTTGCTGCGGGGATCAAGTTGAAAGATCTTCAGGAATGGTC  
TGGTCAAGATCGATTCTATAAGGGTGATGCCTAATACACCAGCTGCAGTTGGTGAGGCAGCTTCAGTAATG  
AGCCTTGGAACAGCGGCAACGGAAGAAGACGGAGCACTTGTGACTAGGTTGTTTGGCTCTGTGGGGAAGA  
TGTTCAAAGCTGATGAGAAAATGTTTGATGCTGTCACTGGTCTCAGTGGAAGTGGACCAGCGTACATATT  
CTTAGCCATTGAAGCTTTAGCTGATGGAGGAGTAGCTGCTGGTTTACCCCGAGAACTTGCTTTGGGTTTA  
GCTTCACAGACGGTCAGTCAGCTGACCCATAGGTTCTTGAGCTGCAACAATGGTGA

>ShanYou28

ATGGAGACGCTTCCAATTTCCGCGGAGAGCTTCAAGGTAGGGTTCATCGGAGCTGGAAAGATGGCGGAGA  
GTATAGCTCGAGGCGTCGTTGCCTCCGGGATGCTTCCTCCGAATCGCATCTCCACCGCCGTTCACTCGAA  
TCTGAATCGCCGTC AAGTCTTCGAGTCCTTTGGCGTCAATGTCTTCTCCAGTAGCGAAGAAGTTGTTAGA  
GAAAGCGATGTTGTGATCTTCTCTGTGAAACCTCAAGTTGTTAAGAAGGCCATCACGGAAGTAAGGTCAA  
CGCTCTCTAAGGATAAGGTTCTTGTTCGTTGCTGCGGGGATCAAGTTGAAAGATCTTCAGGAATGGTC  
TGGTCAAGATCGATT CATAAGGGTGATGCCTAATACACCAGCTGCAGTTGGTGAGGCAGCTTCAGTAATG  
AGCCTTGGAACAGCGGCAACGGAAGAAGACGGAGCACTTGTGACTAGGTTGTTTGGCTCTGTGGGGAAGA  
TGTTCAAAGCTGATGAGAAAATGTTTGATGCTGTCACTGGTCTCAGTGGAAGTGGACCAGCGTACATATT  
CTTAGCCATTGAAGCTTTAGCTGATGGAGGAGTAGCTGCTGGTTTACCCCGAGAACTTGCTTTGGGTTTA  
GCTTCACAGACGGTCAGTCAGCTGACCCATAGGTTCTTGAGCTGCAACAATGGTGA

>ShanYou107

ATGGAGACGCTTCCAATTTCCGCGGAGAGCTTCAAGGTAGGGTTCATCGGAGCTGGAAAGATGGCGGAGA  
GTATAGCTCGAGGCGTCGTTGCCTCCGGGATGCTTCCTCCGAATCGCATCTCCACCGCCGTTCACTCGAA  
TCTGAATCGCCGTC AAGTCTTCGAGTCCTTTGGCGTCAATGTCTTCTCCAGTAGCGAAGAAGTTGTTAGA  
GAAAGCGATGTTGTGATCTTCTCTGTGAAACCTCAAGTTGTTAAGAAGGCCATCACGGAAGTAAGGTCAA  
CGCTCTCTAAGGATAAGGTTCTTGTTCGTTGCTGCGGGGATCAAGTTGAAAGATCTTCAGGAATGGTC  
TGGTCAAGATCGATT CATAAGGGTGATGCCTAATACACCAGCTGCAGTTGGTGAGGCAGCTTCAGTAATG  
AGCCTTGGAACAGCGGCAACGGAAGAAGACGGAGCACTTGTGACTAGGTTGTTTGGCTCTGTGGGGAAGA  
TGTTCAAAGCTGATGAGAAAATGTTTGATGCTGTCACTGGTCTCAGTGGAAGTGGACCAGCGTACATATT  
CTTAGCCATTGAAGCTTTAGCTGATGGAGGAGTAGCTGCTGGTTTACCCCGAGAACTTGCTTTGGGTTTA  
GCTTCACAGACGGTCAGTCAGCTGACCCATAGGTTCTTGAGCTGCAACAATGGTGA

>CIR

A-

GGAGACGCTTCCAATTTCCGCGGAGAGCTTCAAGGTAGGGTTCATCGGAGCTGGAAAGATGGCGGAGAGT  
ATAGCTCGAGGCGTCGTTGCCTCCGGGATGCTTCCTCCGAATCGCATCTCCACCGCCGTTCACTCGAATC  
TGAATCGCCGTC AAGTCTTCGAGTCCTTTGGCGTCAATGTCTTCTCCAGTAGCGAAGAAGTTGTTAGAGA  
AAGCGATGTTGTGATCTTCTCTGTGAAACCTCAAGTTGTTAAGAAGGCCATCACGGAAGTAAGGTCAACG  
CTCTCTAAGGATAAGGTTCTTGTTCGTTGCTGCGGGGATCAAGTTGAAAGATCTTCAGGAATGGTCTG  
GTCAAGATCGATT CATAAGGGTGATGCCTAATACACCAGCTGCAGTTGGTGAGGCAGCTTCAGTAATGAG  
CCTTGGAACAGCGGCAACGGAAGAAGACGGAGCACTTGTGACTAGGTTGTTTGGCTCTGTGGGGAAGATG  
TTCAAAGCTGATGAGAAAATGTTTGATGCTGTCACTGGTCTCAGTGGAAGTGGACCAGCGTACATATTCT  
TAGCCATTGAAGCTTTAGCTGATGGAGGAGTAGCTGCTGGTTTACCCCGAGAACTTGCTTTGGGTTTAGC  
TTCACAGACGGTCAGTCAGCTGACCCATAGGTTCTTGAGCTGCAACAATGGTGA

>QingCaiR

ATGGAGACGCTTCCAATTTCCGCGGAGAGCTTCAAGGTAGGGTTCATCGGAGCTGGAAAGATGGCGGAGA  
GTATAGCTCGAGGCGTCGTTGCCTCCGGGATGCTTCCTCCGAATCGCATCTCCACCGCCGTTCACTCGAA  
TCTGAATCGCCGTC AAGTCTTCGAGTCCTTTGGCGTCAATGTCTTCTCCAGTAGCGAAGAAGTTGTTAGA  
GAAAGCGATGTTGTGATCTTCTCTGTGAAACCTCAAGTTGTTAAGAAGGCCATCACGGAAGTAAGGTCAA  
CGCTCTCTAAGGATAAGGTTCTTGTTCGTTGCTGCGGGGATCAAGTTGAAAGATCTTCAGGAATGGTC  
TGGTCAAGATCGATT CATAAGGGTGATGCCTAATACACCAGCTGCAGTTGGTGAGGCAGCTTCAGTAATG  
AGCCTTGGAACAGCGGCAACGGAAGAAGACGGAGCACTTGTGACTAGGTTGTTTGGCTCTGTGGGGAAGA  
TGTTCAAAGCTGATGAGAAAATGTTTGATGCTGTCACTGGTCTCAGTGGAAGTGGACCAGCGTACATATT  
CTTAGCCATTGAAGCTTTAGCTGATGGAGGAGTAGCTGCTGGTTTACCCCGAGAACTTGCTTTGGGTTTA

GCTTCACAGACGGTCAGTCAGCTGACCCATAGGTTCTTGGAGCTGCAACAATGGTGA

>ChuanZa

ATGGAGACGCTTCCAATTTCCGCGGAGAGCTTCAAGGTAGGGTTCATCGGAGCTGGAAAGATGGCGGAGA  
GTATAGCTCGAGGCGTCGTTGCCTCCGGGATGCTTCCTCCGAATCGCATCTCCACCGCCGTTCACTCGAA  
TCTGAATCGCCGTCAAGTCTTCGAGTCCTTTGGCGTCAATGTCTTCTCCAGTAGCGAAGAAGTTGTTAGA  
GAAAGCGATGTTGTGATCTTCTCTGTGAAACCTCAAGTTGTTAAGAAGGCCATCACGGAAGTAAGGTCAA  
CGCTCTCTAAGGATAAGGTTCTTGTTCGTTGCTGCGGGGATCAAGTTGAAAGATCTTCAGGAATGGTC  
TGGTCAAGATCGATTATAAGGGTGATGCCTAATACACCAGCTGCAGTTGGTGAGGCAGCTTCAGTAATG  
AGCCTTGGAACAGCGGCAACGGAAGAAGACGGAGCACTTGTGACTAGGTTGTTTGGCTCTGTGGGGAAGA  
TGTTCAAAGCTGATGAGAAAATGTTTGATGCTGTCACTGGTCTCAGTGGAAGTGGACCAGCGTACATATT  
CTTAGCCATTGAAGCTTTAGCTGATGGAGGAGTAGCTGCTGGTTTACCCCGAGAACTTGCTTTGGGTTTA  
GCTTCACAGACGGTCAGTCAGCTGACCCATAGGTTCTTGGAGCTGCAACAATGGTGA

>HanYou8

A-

GGAGACGCTTCCAATTTCCGCGGAGAGCTTCAAGGTAGGGTTCATCGGAGCTGGAAAGATGGCGGAGAGT  
ATAGCTCGAGGCGTCGTTGCCTCCGGGATGCTTCCTCCGAATCGCATCTCCACCGCCGTTCACTCGAATC  
TGAATCGCCGTCAAGTCTTCGAGTCCTTTGGCGTCAATGTCTTCTCCAGTAGCGAAGAAGTTGTTAGAGA  
AAGCGATGTTGTGATCTTCTCTGTGAAACCTCAAGTTGTTAAGAAGGCCATCACGGAAGTAAGGTCAACG  
CTCTCTAAGGATAAGGTTCTTGTTCGTTGCTGCGGGGATCAAGTTGAAAGATCTTCAGGAATGGTCTG  
GTCAAGATCGATTATAAGGGTGATGCCTAATACACCAGCTGCAGTTGGTGAGGCAGCTTCAGTAATGAG  
CCTTGGAACAGCGGCAACGGAAGAAGACGGAGCACTTGTGACTAGGTTGTTTGGCTCTGTGGGGAAGATG  
TTCAAAGCTGATGAGAAAATGTTTGATGCTGTCACTGGTCTCAGTGGAAGTGGACCAGCGTACATATTCT  
TAGCCATTGAAGCTTTAGCTGATGGAGGAGTAGCTGCTGGTTTACCCCGAGAACTTGCTTTGGGTTTAGC  
TTCACAGACGGTCAGTCAGCTGACCCATAGGTTCTTGGAGCTGCAACAATGGTGA

>Nan12R

ATGGAGACGCTTCCAATTTCCGCGGAGAGCTTCAAGGTAGGGTTCATCGGAGCTGGAAAGATGGCGGAGA  
GTATAGCTCGAGGCGTCGTTGCCTCCGGGATGCTTCCTCCGAATCGCATCTCCACCGCCGTTCACTCGAA  
TCTGAATCGCCGTCAAGTCTTCGAGTCCTTTGGCGTCAATGTCTTCTCCAGTAGCGAAGAAGTTGTTAGA  
GAAAGCGATGTTGTGATCTTCTCTGTGAAACCTCAAGTTGTTAAGAAGGCCATCACGGAAGTAAGGTCAA  
CGCTCTCTAAGGATAAGGTTCTTGTTCGTTGCTGCGGGGATCAAGTTGAAAGATCTTCAGGAATGGTC  
TGGTCAAGATCGATTATAAGGGTGATGCCTAATACACCAGCTGCAGTTGGTGAGGCAGCTTCAGTAATG  
AGCCTTGGAACAGCGGCAACGGAAGAAGACGGAGCACTTGTGCTAAGTTGTTTGGCTCTGTGGGGAAGA  
TGTTCAAAGCTGATGAGAAAATGTTTGATGCTGTCACTGGTCTCAGTGGAAGTGGACCAGCGTACATATT  
CTTAGCCATTGAAGCTTTAGCTGATGGAGGAGTAGCTGCTGGTTTACCCCGAGAACTTGCTTTGGGTTTA  
GCTTCACAGACGGTCAGTCAGCTGACCCATAGGTTCTTGGAGCTGCAACAATGGTGA

>ZhongYou821

ATGGAGACGCTTCCAATTTCCGCGGAGAGCTTCAAGGTAGGGTTCATCGGAGCTGGAAAGATGGCGAAGA  
GTATAGCTCGAGGCGTCGTTGCCTCCGGGATGCTTCCTCCGAATCGCATCTCCACCGCCGTTCACTCGAA  
TCTGAATCGCCGTCAAGTCTTCGAGTCCTTTGGCGTCAATGTCTTCTCCAGTAGCGAAGAAGTTGTTAGA  
GAAAGCGATGTTGTGATCTTCTCTGTGAAACCTCAAGTTGTTAAGAAGGCCATCACGGAAGTAAGGTCAA  
CGCTCTCTAAGGATAAGGTTCTTGTTCGTTGCTGCGGGGATCAAGTTGAAAGATCTTCAGGAATGGTC  
TGGTCAAGATCGATTATAAGGGTGATGCCTAATACACCAGCTGCAGTTGGTGAGGCAGCTTCAGTAATG  
AGCCTTGGAACAGCGGCAACGGAAGAAGACGGAGCACTTGTGACTAGGTTGTTTGGCTCTGTGGGGAAGA  
TGTTCAAAGCTGATGAGAAAATGTTTGATGCTGTCACTGGTCTCAGTGGAAGTGGACCAGCGTACATATT

CTTAGCCATTGAAGCTTTAGCTGATGGAGGAGTAGCTGCTGGTTTACCCGAGAACTTGCTTTGGGTTTA  
GCTTCACAGACGGTCAGTCAGCTGACCCATAGGTTCTTGGAGCTGCAACAATGGTGA
